# Supplementary material for: Validation study of MARCKSL1 as a prognostic factor in lymph node-negative breast cancer patients
Source: PLOS journal article supplement (doi:10.1371/journal.pone.0212527), 2019-03-11
Supplement: S1 (10.1371/journal.pone.0212527.s001) [file journal.pone.0212527.s001]

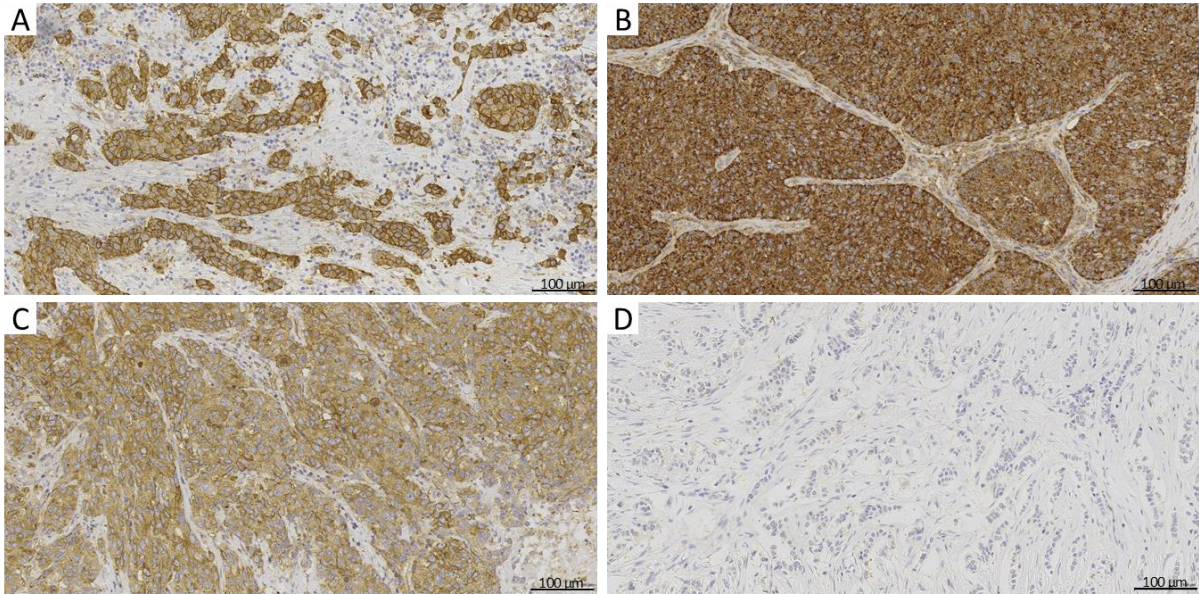

**S1 Fig. Example of MARCKSL1 (myristoylated alanine-rich C kinase substrate like-1) staining (brown staining).** A) Strong membrane staining. B) Strong granular staining. C) Strong cytoplasmic staining. D) Negative/Weak staining.
